# Supplementary material for: Thermo-hygrometric aging increases marginal gap of lithium disilicate and leucite-reinforced CAD/CAM veneers but not resin nano-ceramic: an in-vitro comparative study
Source: Research Square preprint supplement (doi:10.21203/rs.3.rs-8243485/v1), 2025-12-22
Supplement: Supplementary file 1 [file 60b1d8d58613ca5d53f494c5.docx]

Editorial Manager Submission Checklist — Scientific Reports

• Article type: Research Article (in‑vitro).

• Manuscript: IMRaD structure; 4,000 words; Vancouver references (40 items) with DOIs/URLs where available.

• Figures: 2 PNG files uploaded separately at 300 dpi (Figure 1 and Figure 2).

• Tables: Word file with three tables (materials; AAA regimen; marginal gap results).

• Declarations: Ethics/consent not applicable; data availability statement; funding/COI statements; authors’ contributions; LLM disclosure.

• Compliance with Scientific Reports submission guidelines confirmed.

• Open data plan: OSF/Zenodo repository upon acceptance.
